# Supplementary material for: Gene ssa-miR-301a-3p improves rainbow trout (Oncorhynchus mykiss) resistance to heat stress by targeting hsp90b2
Source: PeerJ journal article supplement (doi:10.7717/peerj.13476), 2022-07-05
Supplement: Supplemental_Files.zip [file 48H-Dual-luciferase reporter assay.xlsx]

## Sheet: P53
	24H		hsp90b2- WT		hsp90b2- MUT		PC
			mimics NC	ssa-miR-301a-3p	mimics NC	ssa-miR-301a-3p	mimics NC	ssa-miR-301a-3p
	firefly	437	76521	28124	80662	110520	76165	26213
		367	73258	23247	79830	105650	72371	22214
		368	78967	25151	83294	106510	76672	24333
	renila	862	2256944	2356400	1927200	2569500	2163700	2392300
		858	2230000	2126300	1767100	2202900	2480000	2531400
		844	2620000	2326200	1863100	2225200	2520600	2468700
	F/R		0.033724	0.011754	0.0416464	0.0428566	0.0350133	0.0107785
			0.0341629	0.0130594	0.0454609	0.0500231	0.0305743	0.0102136
			0.0278296	0.00983892	0.0426698	0.0473315	0.0285754	0.00885222
F/R均值	AVG		0.0319055	0.0115508	0.043259	0.046737	0.0313876	0.0099481
	Rate to NC		1	0.362031	1	1.0804	1	0.316943
正偏差	(MAX-AVG)/AVG		0.0569955	-0.148202	0.0509006	0.0703098	0.115511	0.0834687
负偏差	(AVG-MIN)/AVG		0.127749	-0.0175942	0.0372787	0.0830279	0.0895976	0.11016
			hsp90b2- WT		hsp90b21- MUT		PC
			mimics NC	ssa-miR-301a-3p	mimics NC	ssa-miR-301a-3p	mimics NC	ssa-miR-301a-3p
		Rate to NC	1	0.362031	1	1.0804	1	0.316943
		正偏差	0.0569955	-0.148202	0.0509006	0.0703098	0.115511	0.0834687
		负偏差	0.127749	-0.0175942	0.0372787	0.0830279	0.0895976	0.11016
					mimics NC	ssa-miR-301a-3p
			hsp90b2- WT		1	0.362031
			hsp90b2- MUT		1	1.0804
			PC		1	0.316943
