# Supplementary material for: Gene ssa-miR-301a-3p improves rainbow trout (Oncorhynchus mykiss) resistance to heat stress by targeting hsp90b2
Source: PeerJ journal article supplement (doi:10.7717/peerj.13476), 2022-07-05
Supplement: Supplemental_Files.zip [file hsp90b2 Ct.xlsx]

## Sheet: Sheet1
T	HSP90b2CT	B-actianCT
18-1	17.4	16.88
18-2	18.05	17.25
18-3	18.03	17.15
24-1	15.22	17.07
24-2	14.97	17.02
24-3	14.63	16.03
