# Supplementary material for: Gene ssa-miR-301a-3p improves rainbow trout (Oncorhynchus mykiss) resistance to heat stress by targeting hsp90b2
Source: PeerJ journal article supplement (doi:10.7717/peerj.13476), 2022-07-05
Supplement: Supplemental_Files.zip [file hsp90b2 RNA-seq.xlsx]

## Sheet: Sheet1
T	FPKM
18-1	192.61
18-2	250.566
18-3	249.482
24-1	716.781
24-2	715.561
24-3	558.998
