# Supplementary material for: Gene ssa-miR-301a-3p improves rainbow trout (Oncorhynchus mykiss) resistance to heat stress by targeting hsp90b2
Source: PeerJ journal article supplement (doi:10.7717/peerj.13476), 2022-07-05
Supplement: Supplemental_Files.zip [file ssa-miR-301a Ct.xlsx]

## Sheet: Sheet1
T	ssa-miR-301a	U6
18-1	25.81	16.25
18-2	24.9	15.1
18-3	25.24	15.42
24-1	25.36	15.35
24-2	26.44	14.74
24-3	28.71	16.27
