# Supplementary material for: Gene ssa-miR-301a-3p improves rainbow trout (Oncorhynchus mykiss) resistance to heat stress by targeting hsp90b2
Source: PeerJ journal article supplement (doi:10.7717/peerj.13476), 2022-07-05
Supplement: Supplemental_Files.zip [file ssa-miR-301a RNA-seq.xlsx]

## Sheet: Sheet1
T	TPM
18-1	6.00963
18-2	4.73989
18-3	3.89979
24-1	1.52685
24-2	2.0596
24-3	1.57113
